## Gene Info: Easy retrieval of gene product information on any website

James D.R. Knight<sup>1</sup>, Payman Samavarchi-Tehrani<sup>1</sup> and Anne-Claude Gingras<sup>1,2\*</sup>

<sup>1</sup> Lunenfeld-Tanenbaum Research Institute, Sinai Health System, Toronto, ON, Canada

<sup>2</sup> Department of Molecular Genetics, University of Toronto, Toronto, ON, Canada

### **\*Corresponding author:**

Anne-Claude Gingras

Lunenfeld-Tanenbaum Research Institute at Mount Sinai Hospital

600 University Ave, Rm 992A

Toronto, ON M5G 1X5

CANADA

tel: (416) 586-5027

fax: (416) 586-8869

[gingras@lunenfeld.ca](mailto:gingras@lunenfeld.ca)

Viewing information about gene products is a constant part of the molecular biologist's life. While there are many high quality and well-designed resources to fulfill this need, they require the user to navigate to these resources, execute a search, select the desired result and then view its information. This can be a repetitive, time-consuming and even disruptive process, for example when exploring the results of large scale genomics or proteomics screens or reading an online article.

To address this issue we have developed a Chrome extension that allows users to retrieve customizable gene product information – especially as it relates to proteins and their expression and functions – directly on a website without having to navigate to another page. Simply double-clicking (or alternatively, mouse dragging) on a gene name or supported accession (Ensembl, Entrez, neXtProt, RefSeq or UniProt) will open an information panel on the current page (**Fig. 1**). This panel can include gene synonyms, the full gene name, alternative names, the size and molecular weight of its canonical protein product, the UniProt description, protein domains and regions, GO terms, protein localization, RNA tissue expression, protein interactors and links to external resources (Ensembl, NCBI and Uniprot for all species, and organism-specific databases: dictyBase, FlyBase, MGI, neXtProt, SGD, TAIR, WormBase, Xenbase and ZFIN). It also offers an alternative tooltip mode that simply provides links to these external resources. The extension is customizable, allowing the user to select which type of information they would like to see, and supports queries for *Homo sapiens* and nine model organisms: *Arabidopsis thaliana*, *Caenorhabditis elegans*, *Danio rerio*, *Dictyostelium discoideum*, *Drosophila melanogaster*, *Gallus gallus*, *Mus musculus*, *Saccharomyces*

*cerevisiae* and *Xenopus laevis*. The extension also comes equipped with a search bar for entering queries manually (results still open on the current webpage). While double-clicking to retrieve results is not possible on websites with embedded content such as Google Docs or PDFs, querying with the search bar does work on these pages.

The extension collates data from BioGRID (<https://thebiogrid.org><sup>1</sup>), Compartments (<https://compartments.jensenlab.org><sup>2</sup>), GO (<http://www.geneontology.org><sup>3, 4</sup>), Human Protein Atlas (<https://www.proteinatlas.org><sup>5</sup>,<sup>6</sup>), IntAct (<https://www.ebi.ac.uk/intact><sup>7</sup>), Pfam (<https://pfam.xfam.org><sup>8</sup>) and UniProt (<https://www.uniprot.org><sup>9</sup>). The database is updated monthly to incorporate changes from these resources. Gene Info is available for free at the Chrome Web Store. The download link, documentation and source code can be found at <https://gene-info.lunenfeld.ca>

## ACKNOWLEDGEMENTS

We are grateful to all members of the Gingras lab for feedback on the extension. We acknowledge funding from the Governments of Canada and Ontario through Genome Canada, Ontario Genomics and the Ontario Research Fund (OGI-139 to A.-C.G. and RE08-065 to A.-C.G.) and the Canadian Institutes of Health Research (Foundation grant FDN143301 to A.-C.G). A.-C.G. is the Canada Research Chair in Functional Proteomics and the Lea Reichmann Chair in Cancer Proteomics.

## AUTHOR CONTRIBUTIONS

J.D.R.K., P.S.T. and A.-C.G. conceived of the extension. J.D.R.K. wrote the code.

J.D.R.K. and A.-C.G. wrote the manuscript with input from P.S.T.

## COMPETING FINANCIAL INTERESTS

The authors declare no competing financial interests.

## REFERENCES

1. Stark, C. et al. *Nucleic Acids Res* **34**, D535-539 (2006).
2. Binder, J.X. et al. *Database (Oxford)* **2014**, bau012 (2014).
3. The Gene Ontology, C. *Nucleic Acids Res* **45**, D331-D338 (2017).
4. Ashburner, M. et al. *Nat Genet* **25**, 25-29 (2000).
5. Thul, P.J. et al. *Science* **356** (2017).
6. Uhlen, M. et al. *Science* **347**, 1260419 (2015).
7. Orchard, S. et al. *Nucleic Acids Res* **42**, D358-363 (2014).
8. El-Gebali, S. et al. *Nucleic Acids Res* **47**, D427-D432 (2019).
9. UniProt Consortium, T. *Nucleic Acids Res* **46**, 2699 (2018).

## FIGURE LEGENDS

**Figure 1.** Screenshot of Gene Info Chrome extension. Double-clicking on a gene name (in this case UBAP2L) opens an information panel (left side) displaying information about the query. The extension has a number of settings that can be customized by clicking on its icon in the browser toolbar (right side).

**Gene:** UBAP2L  
**Synonyms:** KIAA0144, NICE4  
**Name:** Ubiquitin-associated protein 2-like  
**Alternative Names:**  
 • Protein NICE-4  
**Length:** 1087aa      **MW:** 114.54kDa  
**Ensembl:** ENSG00000143569  
**NCBI:** 9898  
**neXtProt:** NX\_Q14157  
**UniProt:** Q14157  
**Description:** Plays an important role in the activity of long-term repopulating hematopoietic stem cells (LT-HSCs).

**DOMAINS:** Pfam

| Start - End | Name    |
|-------------|---------|
| 495-526     | DUF3697 |

**EXPRESSION (RNA):** Protein Atlas  
 RNA expression values are reported as transcripts per million (TPM) and binned into expression level categories: no expression (none), low, medium or high. See HPA RNA-seq data for more.

| Tissue  | TPM   | Level |
|---------|-------|-------|
| HEK 293 | 180.5 | high  |
| HeLa    | 125   | high  |
| Hep G2  | 112.2 | high  |
| U-2 OS  | 130.7 | high  |

Advanced

cel.2017.12.020. Epub 2018 Jan 25.

### Reveals the Subcellular Organization

hkurov M<sup>1</sup>, Chen G<sup>2</sup>, Bagci H<sup>3</sup>, Rathod B<sup>1</sup>, MacLeod G<sup>4</sup>, En

imately degradation involve a series of dedicated proteins such as stress granules (SGs) and processing bodies (PBs). Analysis of 119 human proteins associated with different processes or complexes, including the splicing and the CCR4-NOT deadenylase complex (CEP85, R...ous preys uncovers the spatial organization of RNA regulatory structures and f SGs and PBs. We report preexisting contacts between most core SG nonstrate that several core SG proteins (UBAP2L, CSDE1, and PRRC2C) are SGs.

L; mass spectrometry; membraneless organelle; processing body; proximity-based

Sociology of Droplet Compartments. [Mol Cell. 2018]

#### Activation method:

- Double click
- Drag
- Disable

#### Display options:

- Detailed report
- Tooltip report

#### Species:

Homo sapiens

#### Query type:

Gene name

- Auto detect

#### Search:

Accession/ID/name...

#### Information options:

- Basic
- Description
- Domain
- GO terms
- Interactors
- Links
- Localization
- RNA expression

About Documentation Report issue Rate

Human MARF1 is an endoribonuclease that interacts with the I [Nucleic Acids Res. 2018]

**Review** Post-transcriptional Regulatory Functions of Mammals [Trends Genet. 2018]

See all...

#### Related information

Articles frequently viewed together

Gene

MedGen
